# Supplementary material for: Combining laser-assisted microdissection (LAM) and RNA-seq allows to perform a comprehensive transcriptomic analysis of epidermal cells of Arabidopsis embryo
Source: PubMed Central journal article supplement (PMC5797369; doi:10.1186/s13007-018-0275-x), 2018-02-03
Supplement: 13007_2018_275_MOESM2_ESM.pdf [file 13007_2018_275_MOESM2_ESM.pdf]

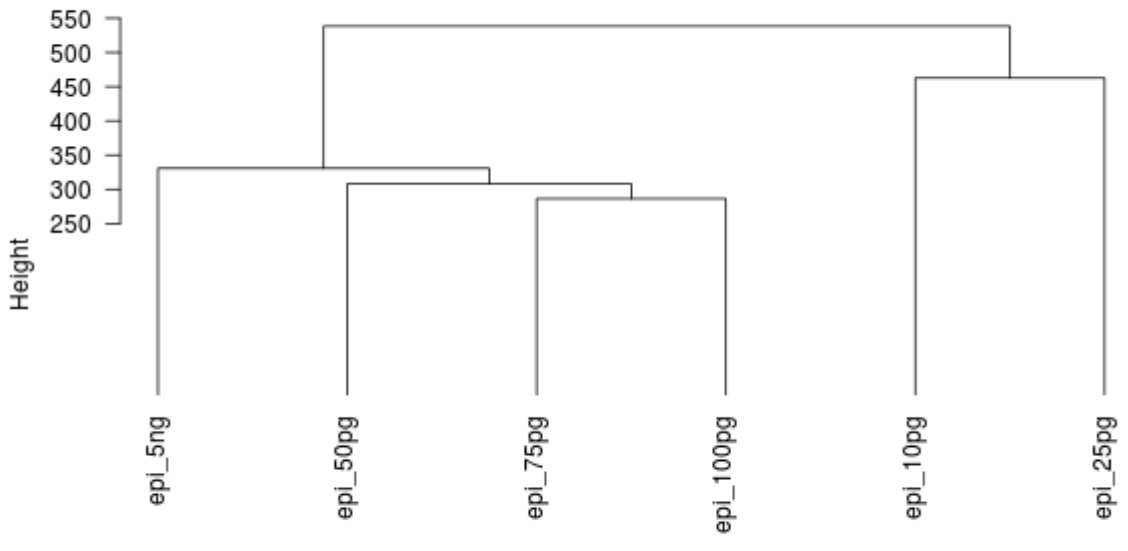

Method: Euclidean distance - Ward criterion  
hclust (\*, "ward.D")

Supp figure 2:
