# Supplementary material for: Combining laser-assisted microdissection (LAM) and RNA-seq allows to perform a comprehensive transcriptomic analysis of epidermal cells of Arabidopsis embryo
Source: PubMed Central journal article supplement (PMC5797369; doi:10.1186/s13007-018-0275-x), 2018-02-03
Supplement: 13007_2018_275_MOESM3_ESM.pdf [file 13007_2018_275_MOESM3_ESM.pdf]

### Individuals factor map – PCA on Normalized Counts

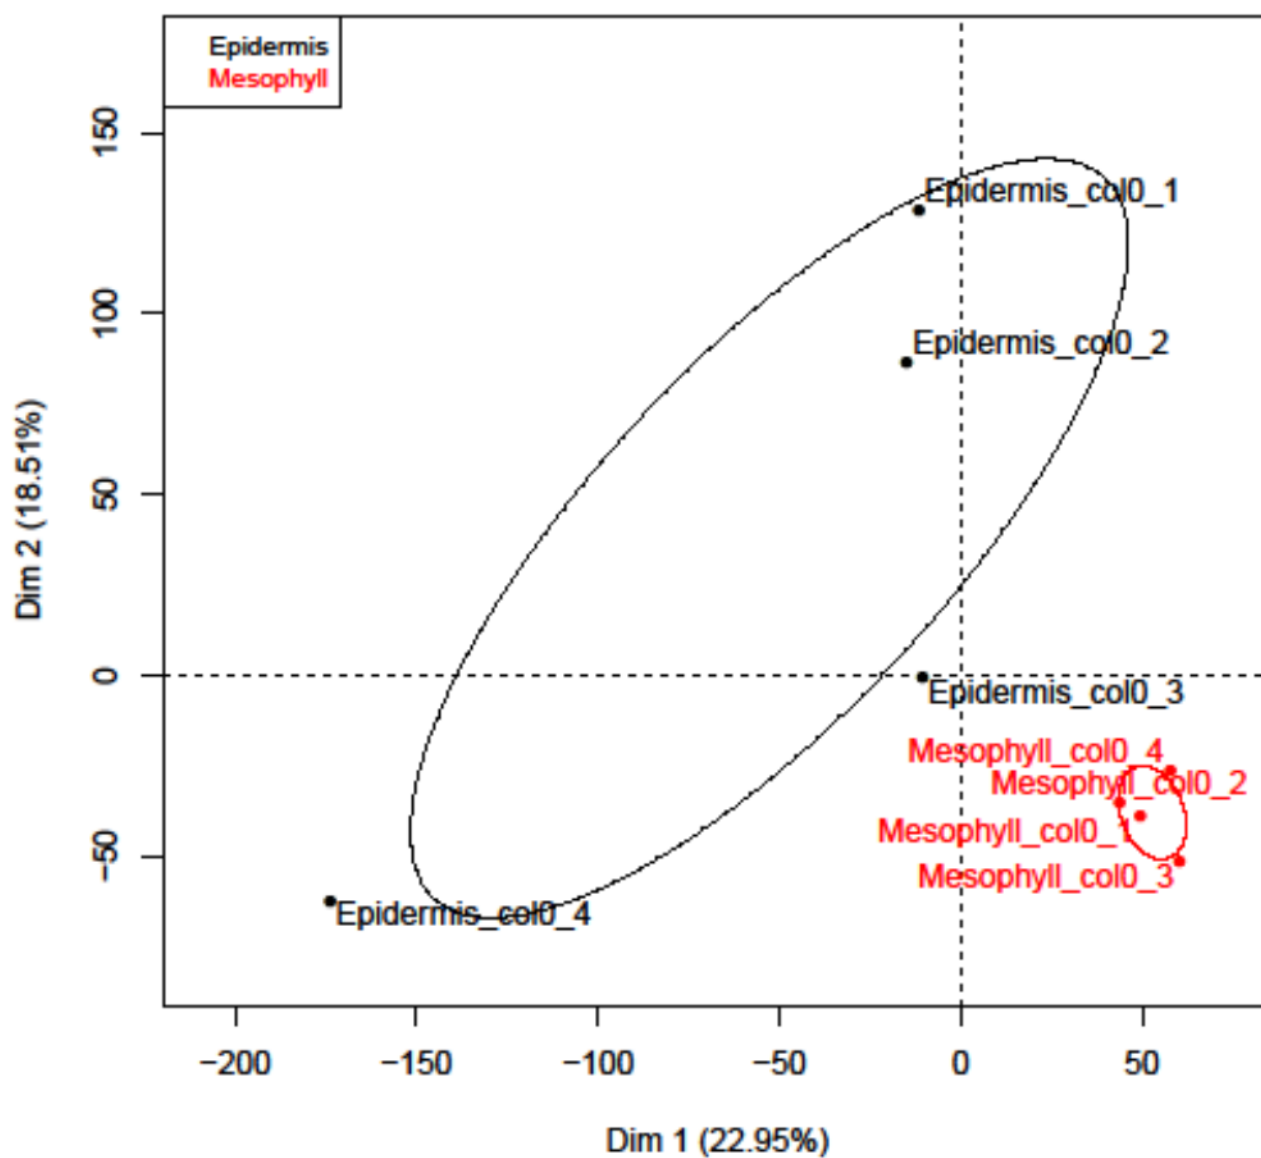

1st axis: Epidermis/Mesophyll

Supp figure 3:
